# Supplementary material for: Spintronic filter via p-typed polaron state in photoelectron conversion integrating devices
Source: Royal Society of Chemistry journal article supplement (doi:10.1039/d3se00641g), 2023-01-01
Supplement: d3se00641g1.pdf [file d3se00641g1.pdf]

# Supplementary Information

## Spintronic Filter via p Typed Polaron state in Photoelectron Conversion Integrating Devices

Yi-Sheng Lai<sup>1,\*</sup>, Dao-Jing Huang<sup>2</sup>, Xiu-Xuan Zhang<sup>1</sup>, Yen-Hsun Su<sup>2</sup>

<sup>1,\*</sup> *Department of Mechanical Engineering, National Chung Cheng University, Chiayi  
621301, Taiwan*

<sup>2</sup>*Department of Materials Science and Engineering, National Cheng Kung University,  
Tainan 70101, Taiwan*

[\\*yslai@ccu.edu.tw](mailto:yslai@ccu.edu.tw)

**Keyword: polaron, spintronics controlling system, water splitting devices, surface  
state, Cu<sub>2</sub>O, charge mobility**

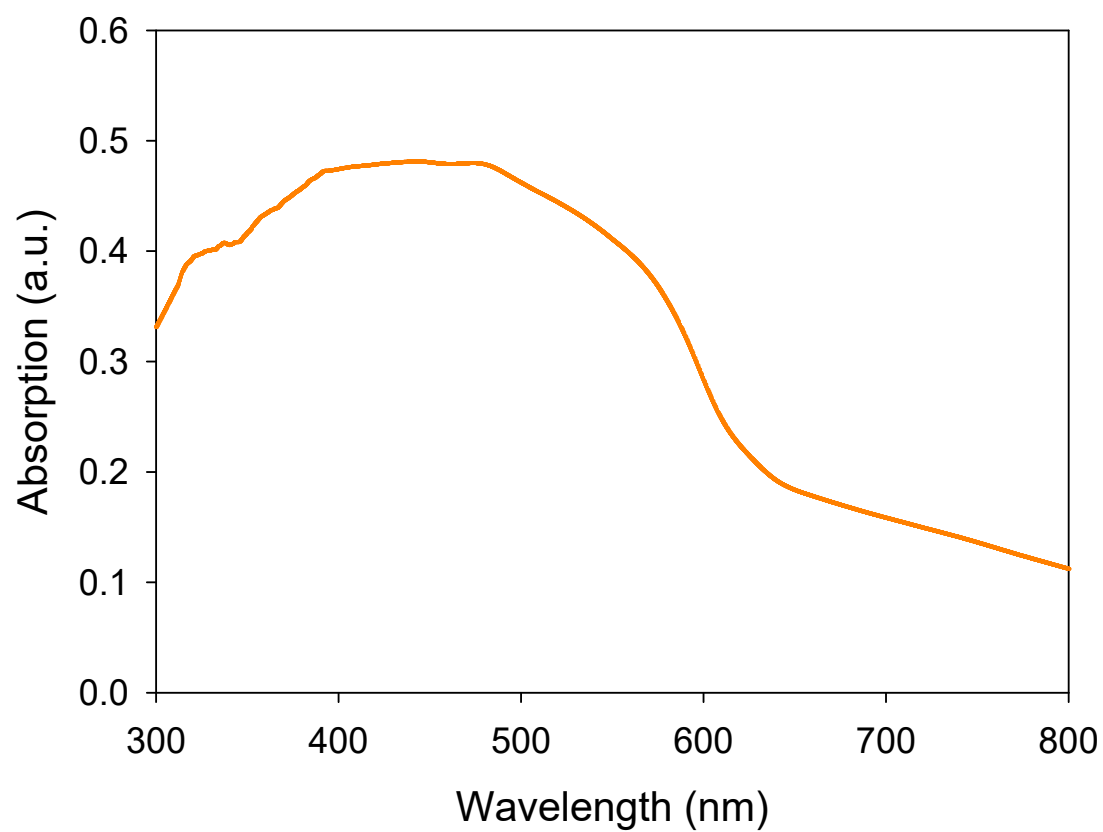

Fig. S1 Absorption spectrum of CuO-Cu<sub>2</sub>O nanocubes on ITO substrates.

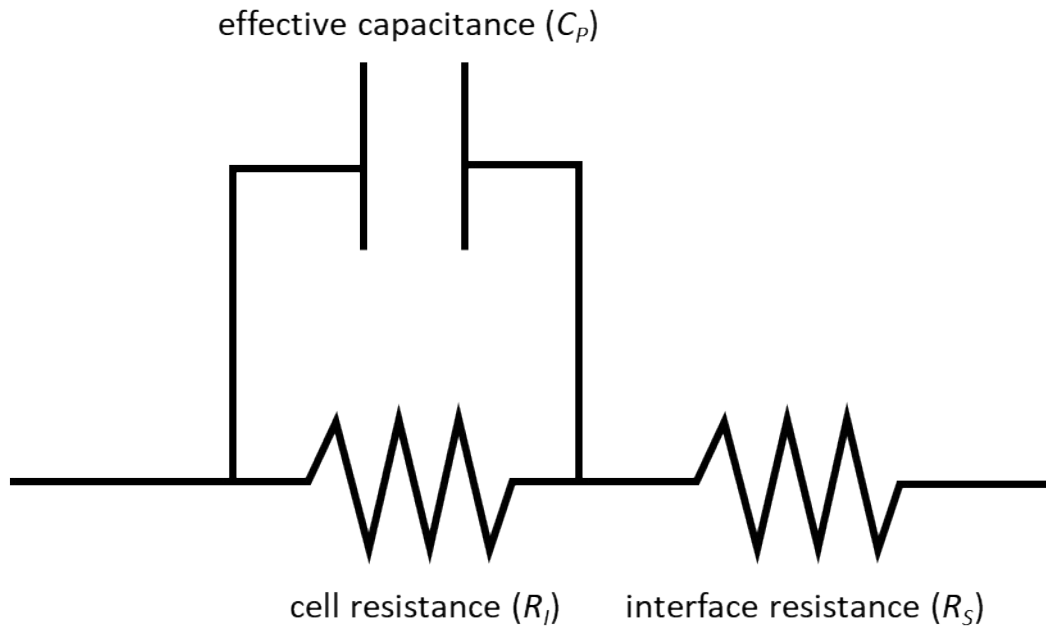

Fig. S2 Equivalent circuit diagram of CuO-Cu<sub>2</sub>O nanocubes photocathode water splitting devices for modeling the electrochemical cell of CuO-Cu<sub>2</sub>O nanocubes photocathode in a two-electrode configuration at an optimal potential bias ( $R_s$ , interface resistance between electrode and electrolyte;  $R_l$ , cell resistance;  $C_p$ , effective capacitance) via AC impedance.

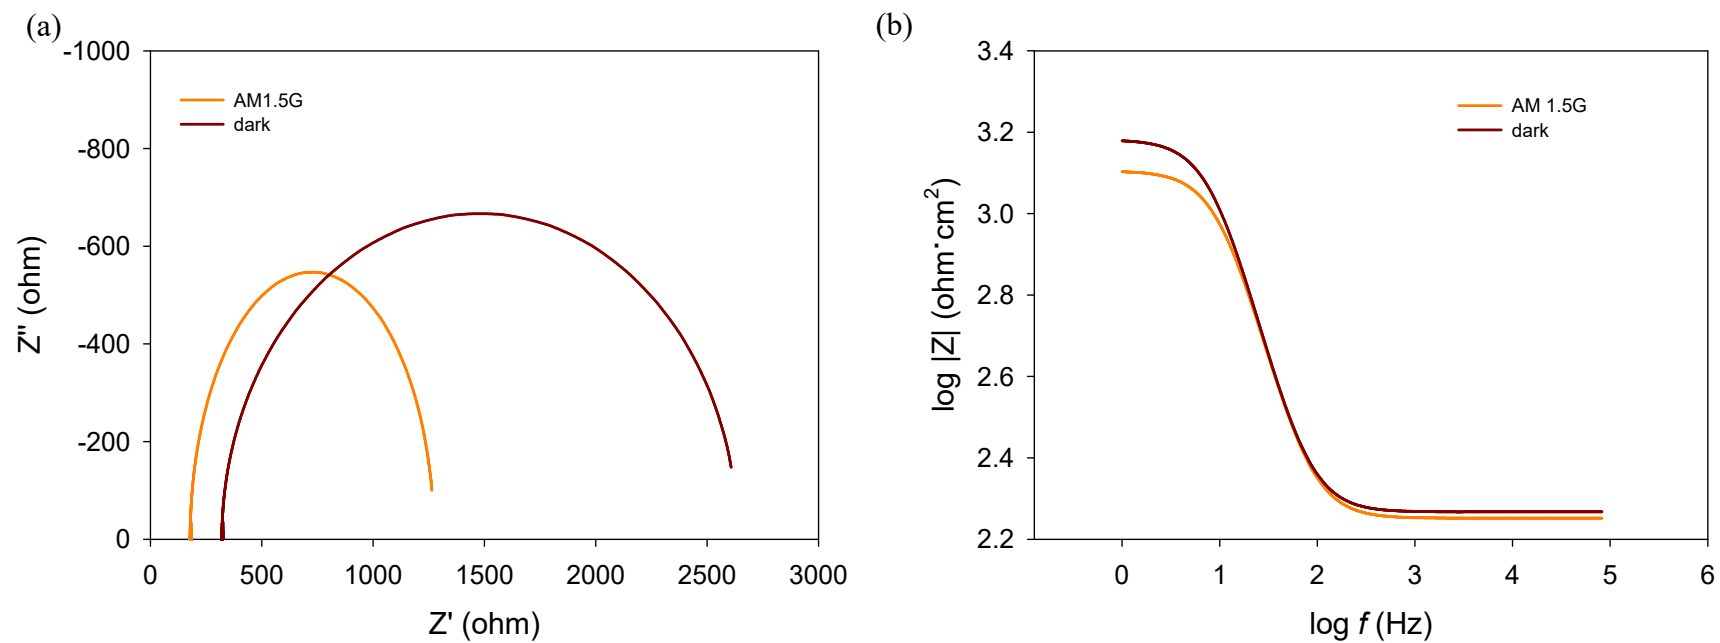

Fig. S3 Nyquist diagram (a) and Bode plots (b) of CuO-Cu<sub>2</sub>O nanocubes photocathode under AM 1.5G irradiation, at 0.98 V in a two-electrode configuration in 1 M KHCO<sub>3</sub> electrolyte.

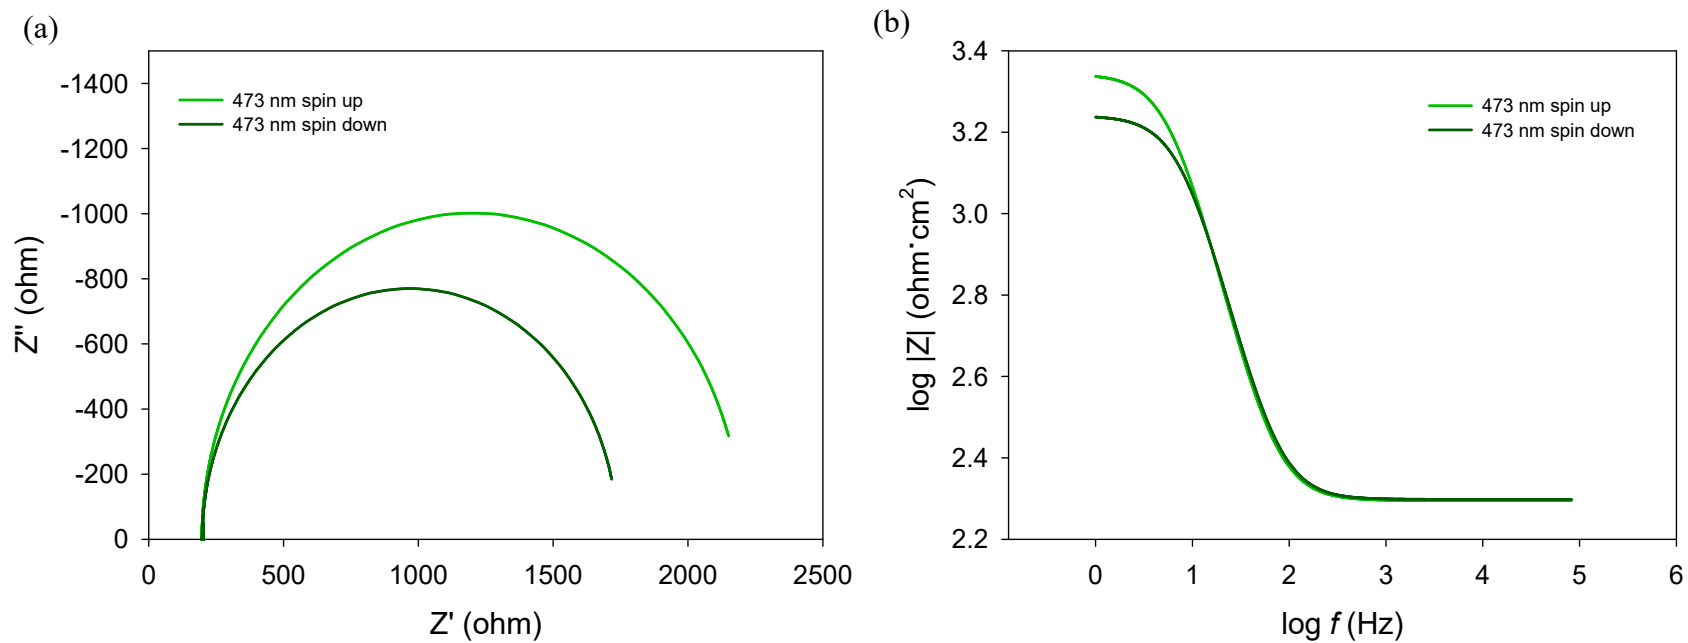

Fig. S4 Nyquist diagram (a) and Bode plots (b) of CuO-Cu<sub>2</sub>O nanocubes photocathode under 473 nm laser (with  $\hbar/\hbar$  angular momentum modulation) irradiation, at 0.75 V in a two-electrode configuration in 1 M KHCO<sub>3</sub> electrolyte.

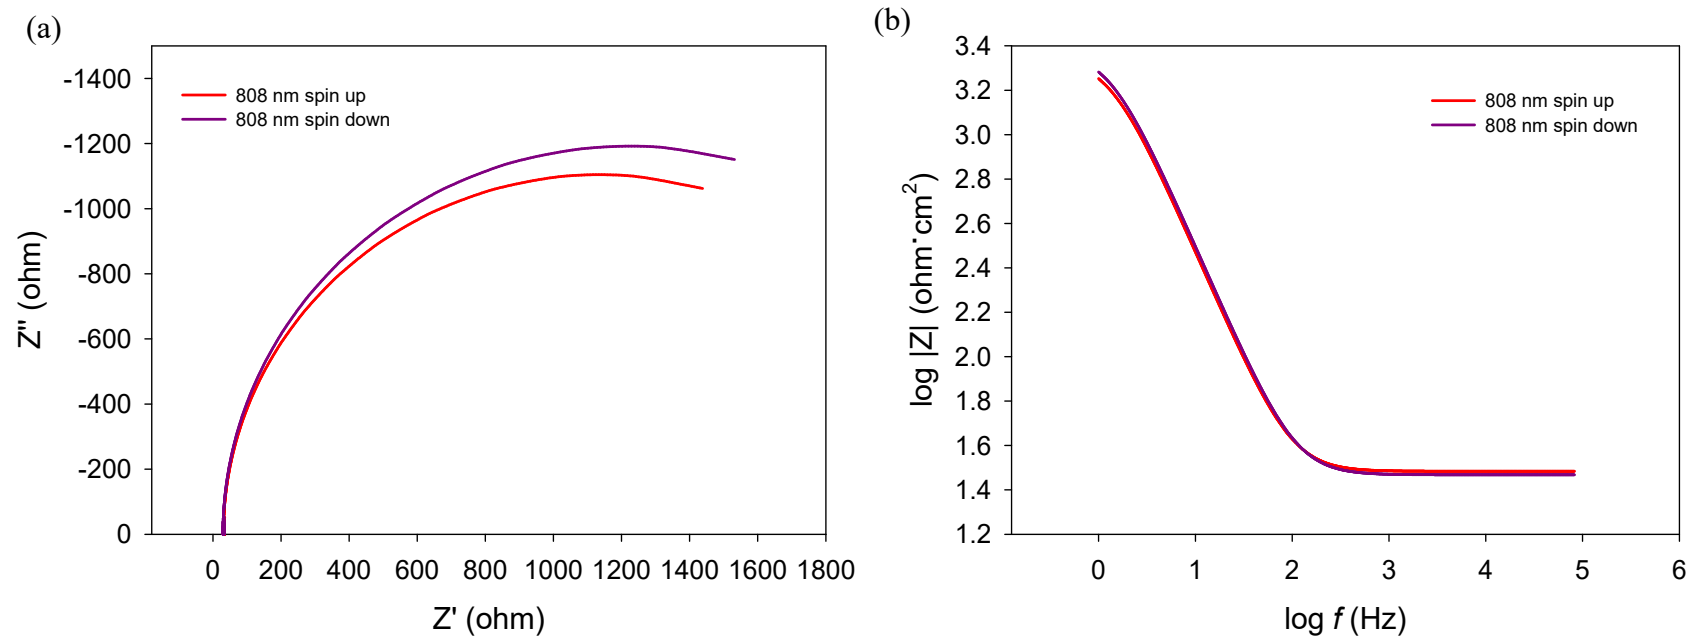

Fig. S5 Nyquist diagram (a) and Bode plots (b) of CuO-Cu<sub>2</sub>O nanocubes photocathode under 808 nm laser (with  $\hbar/\hbar$  angular momentum modulation) irradiation, at 0.90 V in a two-electrode configuration in 1 M KHCO<sub>3</sub> electrolyte.

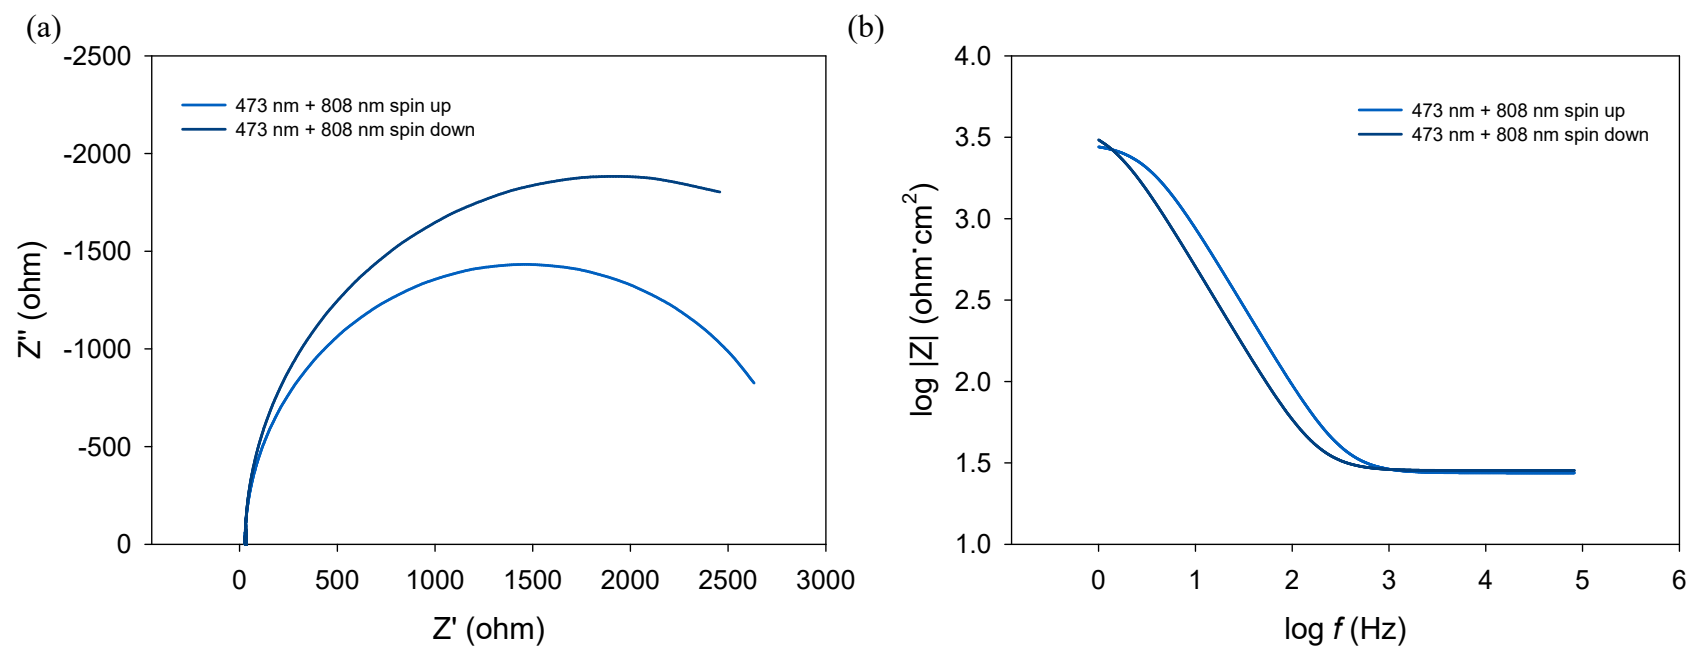

Fig. S6 Nyquist diagram (a) and Bode plots (b) of CuO-Cu<sub>2</sub>O nanocubes photocathode under 473 nm laser combined with 808 nm laser (only 808 nm laser with  $\hbar/\hbar$  angular momentum modulation) irradiation, at 0.90 V in a two-electrode configuration in 1 M KHCO<sub>3</sub> electrolyte.
